# Supplementary material for: MALT-1 mediates IL-17 neural signaling to regulate C. elegans behavior, immunity and longevity
Source: PubMed Central journal article supplement (PMC7190641; doi:10.1038/s41467-020-15872-y), 2020-04-29
Supplement: 41467_2020_15872_MOESM1_ESM.pdf [file 41467_2020_15872_MOESM1_ESM.pdf]

**MALT1 MEDIATES IL-17 NEURAL SIGNALING TO REGULATE *C. ELEGANS*  
BEHAVIOR, IMMUNITY AND LONGEVITY**

Flynn et al.

**Supplementary Information**

## Supplementary Figures

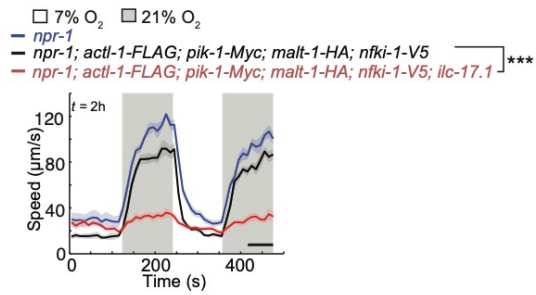

**Supplementary Figure 1.** Related to Figure 1. Knocking in epitope tags into endogenous *actl-1*, *pik-1*, *malt-1*, and *nfki-1* does not disrupt their function.

A strain co-expressing *actl1-1-HA*, *pik-1-Myc*, *malt-1-HA* and *nfki-1-V5* in an *npr-1* background responds to 21% O<sub>2</sub> like *npr-1* controls. Arousal is abolished when these knock-in alleles are crossed into an *ilc-17.1(tm5218)* background. n = 69 animals (*npr-1*), n = 81 animals (*npr-1; actl-1-FLAG; pik-1-Myc; malt-1-HA; nfki-1-V5*), n = 113 animals (*npr-1; actl-1-FLAG; pik-1-Myc; malt-1-HA; nfki-1-V5; ilc-17.1*) \*\*\*, P = 1.18e-27, Mann-Whitney U test.

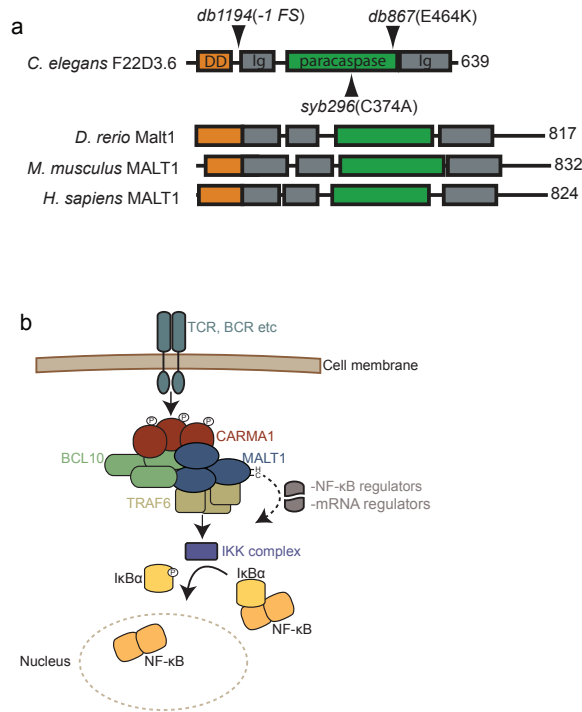

**Supplementary Figure 2.** Related to Figure 1. MALT1.

**a** MALT1 paracaspase domain organization. Black arrows indicate the impact of *malt-1* mutations. DD, death domain; Ig, Immunoglobulin-like fold.

**b** Schematic of MALT1 signaling in mammalian B and T cells. BCR/TCR stimulation induces formation of the CARMA1-BCL10-MALT1 (CBM) signalosome via protein kinase C  $\beta$  (PKC $\beta$ )/PKC $\theta$ -mediated phosphorylation of CARMA1. MALT1 recruits TRAF6, whose ubiquitin ligase activity leads to the recruitment and activation of the IKK complex. This culminates in IKK-mediated phosphorylation of I $\kappa$ B $\alpha$ , triggering its degradation and releasing NF- $\kappa$ B for nuclear translocation. MALT1 also promotes lymphocyte activation by cleaving negative regulators of NF- $\kappa$ B, and factors that regulate mRNA stability. Blast searches do not find nematode orthologs of BCL10 or CARMA.

| source | term name                                                             | term ID       | n. of term genes | n. of query genes | n. of common genes | corrected p-value |  |
|--------|-----------------------------------------------------------------------|---------------|------------------|-------------------|--------------------|-------------------|--|
| BP     | positive regulation of TOR signaling                                  | GO:0032008    | 4                | 43                | 2                  | 4.98e-02          |  |
| BP     | cellular process                                                      | GO:0009987    | 7033             | 43                | 35                 | 5.69e-03          |  |
| BP     | metabolic process                                                     | GO:0008152    | 5447             | 43                | 36                 | 3.08e-07          |  |
| BP     | primary metabolic process                                             | GO:0044238    | 4601             | 43                | 32                 | 7.07e-06          |  |
| BP     | nitrogen compound metabolic process                                   | GO:0008087    | 4283             | 43                | 32                 | 8.86e-07          |  |
| BP     | organic substance metabolic process                                   | GO:0017104    | 4791             | 43                | 33                 | 3.33e-06          |  |
| BP     | organic cyclic compound metabolic process                             | GO:1901380    | 2235             | 43                | 21                 | 2.07e-04          |  |
| BP     | macromolecule metabolic process                                       | GO:0043170    | 3857             | 43                | 33                 | 1.06e-07          |  |
| BP     | gene expression                                                       | GO:0104667    | 1951             | 43                | 24                 | 4.72e-08          |  |
| BP     | cellular metabolic process                                            | GO:0044237    | 4461             | 43                | 33                 | 4.28e-07          |  |
| BP     | heterocyclic metabolic process                                        | GO:0046483    | 2190             | 43                | 21                 | 1.45e-04          |  |
| BP     | cellular aromatic compound metabolic process                          | GO:006725     | 2190             | 43                | 21                 | 1.45e-04          |  |
| BP     | cellular nitrogen compound metabolic process                          | GO:004841     | 2481             | 43                | 25                 | 1.08e-06          |  |
| BP     | nucleic acid containing compound metabolic process                    | GO:006139     | 2134             | 43                | 21                 | 3.20e-05          |  |
| BP     | nucleic acid metabolic process                                        | GO:0090304    | 1823             | 43                | 21                 | 5.49e-06          |  |
| BP     | nucleic acid phosphodiester bond hydrolysis                           | GO:0092005    | 145              | 43                | 6                  | 3.71e-03          |  |
| BP     | RNA metabolic process                                                 | GO:016070     | 1606             | 43                | 20                 | 4.07e-06          |  |
| BP     | RNA polyadenylation                                                   | GO:0043631    | 17               | 43                | 6                  | 5.21e-09          |  |
| BP     | mRNA metabolic process                                                | GO:0016071    | 263              | 43                | 15                 | 3.09e-13          |  |
| BP     | RNA phosphodiester bond hydrolysis                                    | GO:0090501    | 76               | 43                | 5                  | 2.65e-03          |  |
| BP     | mRNA cleavage                                                         | GO:0063379    | 16               | 43                | 5                  | 7.12e-07          |  |
| BP     | RNA processing                                                        | GO:0063366    | 420              | 43                | 16                 | 1.89e-11          |  |
| BP     | RNA 3'-end processing                                                 | GO:0031123    | 43               | 43                | 6                  | 2.43e-06          |  |
| BP     | RNA splicing                                                          | GO:0008360    | 144              | 43                | 10                 | 8.49e-09          |  |
| BP     | RNA splicing, via transesterification reactions                       | GO:0000375    | 121              | 43                | 9                  | 5.63e-08          |  |
| BP     | RNA splicing, via transesterification reactions with ...              | GO:0000377    | 119              | 43                | 9                  | 4.84e-08          |  |
| BP     | mRNA processing                                                       | GO:0063387    | 171              | 43                | 15                 | 3.16e-10          |  |
| BP     | mRNA cleavage involved in mRNA processing                             | GO:0089787    | 3                | 43                | 3                  | 2.32e-05          |  |
| BP     | mRNA 3' end processing                                                | GO:0031124    | 29               | 43                | 6                  | 1.62e-08          |  |
| BP     | mRNA polyadenylation                                                  | GO:0063378    | 15               | 43                | 6                  | 2.12e-09          |  |
| BP     | pre-mRNA cleavage required for polyadenylation                        | GO:0087879    | 3                | 43                | 3                  | 2.32e-05          |  |
| BP     | mRNA splicing, via spliceosome                                        | GO:0090368    | 119              | 43                | 6                  | 4.84e-09          |  |
| BP     | spliceosomal complex assembly                                         | GO:000245     | 23               | 43                | 3                  | 3.94e-02          |  |
| BP     | cellular response to acid chemical                                    | GO:0071229    | 4                | 43                | 2                  | 4.98e-02          |  |
| BP     | cellular response to amino acid stimulus                              | GO:0071230    | 4                | 43                | 2                  | 4.98e-02          |  |
| source | term name                                                             | term ID       | n. of term genes | n. of query genes | n. of common genes | corrected p-value |  |
| CC     | phosphorylase kinase complex                                          | GO:0005964    | 4                | 43                | 2                  | 4.98e-02          |  |
| CC     | EGG complex                                                           | GO:0034448    | 3                | 43                | 2                  | 2.49e-02          |  |
| CC     | organelle                                                             | GO:0043226    | 4519             | 43                | 28                 | 3.33e-03          |  |
| CC     | membrane-bounded organelle                                            | GO:0043227    | 3969             | 43                | 25                 | 7.32e-03          |  |
| CC     | protein-containing complex                                            | GO:0032991    | 2094             | 43                | 23                 | 1.57e-08          |  |
| CC     | G1/G2/G1 Phase complex                                                | GO:1960131    | 2                | 43                | 2                  | 5.33e-03          |  |
| CC     | ribonucleoprotein complex                                             | GO:1960304    | 87               | 43                | 9                  | 3.10e-03          |  |
| CC     | organelle part                                                        | GO:0044422    | 2268             | 43                | 19                 | 4.48e-03          |  |
| CC     | intracellular part                                                    | GO:0050422    | 2268             | 43                | 19                 | 4.48e-03          |  |
| CC     | intracellular organelle part                                          | GO:0044424    | 5416             | 43                | 31                 | 2.62e-03          |  |
| CC     | protein kinase CK2 complex                                            | GO:0059596    | 3                | 43                | 2                  | 2.49e-02          |  |
| CC     | intracellular organelle                                               | GO:0043229    | 4427             | 43                | 28                 | 2.12e-02          |  |
| CC     | nucleus                                                               | GO:0044446    | 2150             | 43                | 19                 | 2.88e-03          |  |
| CC     | intracellular membrane-bounded organelle                              | GO:0043231    | 3653             | 43                | 25                 | 3.26e-03          |  |
| CC     | nuclear part                                                          | GO:0050534    | 2348             | 43                | 7                  | 2.38e-06          |  |
| CC     | spliceosomal complex                                                  | GO:0044428    | 819              | 43                | 13                 | 3.42e-04          |  |
| CC     | prespliceosome                                                        | GO:0056881    | 85               | 43                | 6                  | 4.89e-03          |  |
| CC     | nucleoplasm                                                           | GO:0071010    | 19               | 43                | 3                  | 2.18e-02          |  |
| CC     | nucleoplasm part                                                      | GO:0056854    | 229              | 43                | 7                  | 4.02e-03          |  |
| CC     | nuclear body                                                          | GO:0044451    | 182              | 43                | 7                  | 8.69e-04          |  |
| CC     | nuclear body                                                          | GO:0168004    | 22               | 43                | 3                  | 3.44e-02          |  |
| CC     | nuclear speck                                                         | GO:0168007    | 17               | 43                | 3                  | 5.32e-02          |  |
| CC     | mRNA cleavage factor complex                                          | GO:0058849    | 10               | 43                | 6                  | 8.97e-11          |  |
| CC     | mRNA cleavage and polyadenylation specificity factor ...              | GO:0058847    | 7                | 43                | 6                  | 3.01e-12          |  |
| CC     | catalytic step 3 spliceosome                                          | GO:0071013    | 39               | 43                | 6                  | 4.84e-03          |  |
| CC     | U2-type prespliceosome                                                | GO:0071004    | 13               | 43                | 3                  | 6.50e-03          |  |
| CC     | U2 snRNP                                                              | GO:0056886    | 17               | 43                | 3                  | 1.53e-02          |  |
| source | term name                                                             | term ID       | n. of term genes | n. of query genes | n. of common genes | corrected p-value |  |
| MF     | binding                                                               | GO:0005488    | 6949             | 43                | 35                 | 4.05e-03          |  |
| MF     | heterocyclic compound binding                                         | GO:1901383    | 3149             | 43                | 26                 | 3.06e-05          |  |
| MF     | organic cyclic compound binding                                       | GO:0097159    | 3159             | 43                | 26                 | 3.28e-05          |  |
| MF     | nucleic acid binding                                                  | GO:0030376    | 1818             | 43                | 20                 | 3.47e-05          |  |
| MF     | RNA binding                                                           | GO:0003723    | 564              | 43                | 15                 | 2.61e-08          |  |
| MF     | phosphorylase kinase activity                                         | GO:0004689    | 4                | 43                | 2                  | 4.98e-02          |  |
| source | term name                                                             | term ID       | n. of term genes | n. of query genes | n. of common genes | corrected p-value |  |
| keg    | mRNA surveillance pathway                                             | KEGG:03015    | 73               | 31                | 11                 | 2.28e-10          |  |
| keg    | Spliceosome                                                           | KEGG:03040    | 118              | 31                | 11                 | 4.77e-08          |  |
| source | term name                                                             | term ID       | n. of term genes | n. of query genes | n. of common genes | corrected p-value |  |
| rea    | Gene expression (Transcription)                                       | R-CEL-74160   | 372              | 26                | 13                 | 3.58e-04          |  |
| rea    | RNA Polymerase II Transcription                                       | R-CEL-73857   | 362              | 26                | 13                 | 2.81e-04          |  |
| rea    | RNA Polymerase II Transcription Termination                           | R-CEL-73856   | 47               | 26                | 12                 | 4.72e-14          |  |
| rea    | Cleavage of Growing Transcript in the Termination Region              | R-CEL-196988  | 47               | 26                | 12                 | 4.72e-14          |  |
| rea    | Metabolism of RNA                                                     | R-CEL-4953854 | 348              | 26                | 20                 | 2.39e-12          |  |
| rea    | Processing of Capped Intron-Containing Pre-mRNA                       | R-CEL-72203   | 151              | 26                | 17                 | 1.01e-14          |  |
| rea    | mRNA 3'-end processing                                                | R-CEL-72187   | 47               | 26                | 12                 | 4.72e-14          |  |
| rea    | Transport of Growing Transcript to Cytoplasm                          | R-CEL-72202   | 32               | 26                | 8                  | 7.44e-04          |  |
| rea    | Transport of Mature mRNA derived from an Intron-Containing Transcript | R-CEL-159236  | 32               | 26                | 8                  | 7.44e-04          |  |
| rea    | mRNA Splicing                                                         | R-CEL-72172   | 140              | 26                | 17                 | 2.67e-15          |  |
| rea    | mRNA Splicing - Major Pathway                                         | R-CEL-72163   | 139              | 26                | 17                 | 2.36e-15          |  |
| rea    | Processing of Capped Intronless Pre-mRNA                              | R-CEL-75067   | 21               | 26                | 7                  | 2.05e-08          |  |
| rea    | Processing of Intronless Pre-mRNA                                     | R-CEL-77595   | 20               | 26                | 7                  | 1.38e-08          |  |

**Supplementary Figure 3.** Related to Figure 1. The MALT-1-interacting proteome is enriched in factors involved in RNA metabolism.

Gene ontology and biological pathway enrichment analysis of the 50 factors that specifically co-immunoprecipitate with MALT-1 (Supplementary Data 1), performed with g:Profiler<sup>79</sup>.

| Strain | Position | Reference | Alteration | Effect                | aa change |
|--------|----------|-----------|------------|-----------------------|-----------|
| AX3324 | 6948747  | G         | A          | STOP_GAINED           | W495*     |
| AX3621 | 6948842  | G         | A          | NON_SYNONYMOUS_CODING | E464K     |
| AX3713 | 6948859  | G         | A          | NON_SYNONYMOUS_CODING | C458Y     |
| AX3868 | 6951060  | G         | A          | NON_SYNONYMOUS_CODING | G63R      |

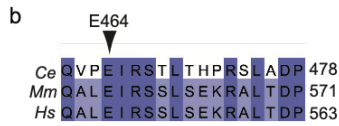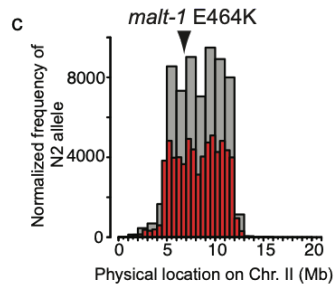

| Strain | Allele | Position | Reference | Alteration | Effect      | aa change |
|--------|--------|----------|-----------|------------|-------------|-----------|
| AX5877 | db1194 | 6950732  | CCACCG-   | --ACCTA    | FRAME_SHIFT | -1        |

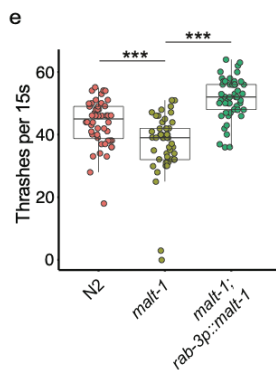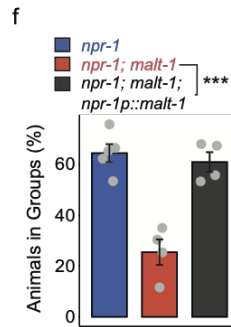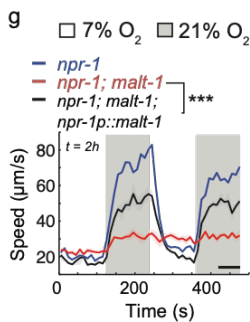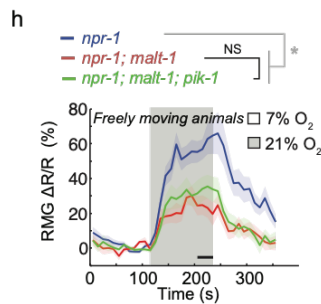

**Supplementary Figure 4.** Related to Figure 1. MALT-1 promotes escape from 21 O<sub>2</sub>.

**a** *malt-1* mutations isolated in a forward genetic screen for loss of aggregation behavior.

**b** The MALT-1 E464 residue mutated in AX3621 is conserved from *Ce* to human, and corresponds to E549 in human, which is known to be required for proteolytic activity. *Mm* = *Mus musculus*, *Hs* = *Homo sapiens*.

**c** The aggregation defect of AX3621 maps close to *malt-1*. Mapping used CloudMap (see Methods), which measures the relative levels of SNPs derived from two genetic backgrounds in aggregation-defective recombinants. N2 single nucleotide polymorphisms (SNPs) are derived from AX3621; Hawaiian SNPs are

derived from the AX288 (*lon-2 npr-1*) Hawaiian background strain. Aggregation-defective recombinants show an enrichment of N2 Bristol SNPs on chromosome II, flanking the physical location of the *malt-1* mutation at 6.9 Mb.

**d** The *malt-1(db1194)* allele, generated using CRISPR/Cas9 genome editing.

**e** *malt-1* mutants exhibit minor defects in thrashing rate. Data are presented as median (centre) and interquartile range (box; the lower and upper bounds of the box represent the 25th and 75th percentiles respectively). Whiskers represent  $\pm 1.5$ x interquartile range. n = 48 animals. \*\*\*, P < 0.001, one-way ANOVA with Tukey's post hoc HSD.

**f** and **g** The aggregation phenotype (**f**) and arousal defect in 21% O<sub>2</sub> (**g**) of *malt-1(db1194)* mutants is rescued by expressing *malt-1* cDNA from the *npr-1* promoter, which drives expression in a broad subset of neurons including URX and RMG<sup>29,47</sup>. (**f**) N = 5 assays (*npr-1*), N = 4 assays (*npr-1; malt-1*) and (*npr-1; malt-1; npr-1p::malt-1*), \*\*\*, P < 0.001, ANOVA with Tukey's post hoc HSD (**g**) n = 44 animals (*npr-1*), n = 84 animals (*npr-1; malt-1*), n = 77 animals (*npr-1; malt-1; npr-1p::malt-1*). \*\*\*, P = 5.33e-08, Mann-Whitney U test.

**h** *malt-1* RMG Ca<sup>2+</sup> transients (reported by YC2.60) in freely moving animals are not further reduced by loss-of-function mutations in *pik-1*. n = 20 animals (*npr-1*), n = 17 animals (*npr-1; malt-1*), n = 17 animals (*npr-1; malt-1; pik-1*). NS, P = 0.3, \*, P < 0.05, two-sided Mann-Whitney U test.

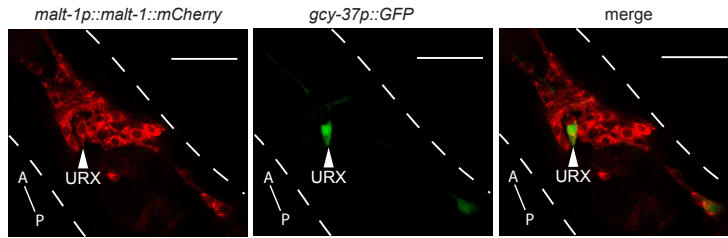

**Supplementary Figure 5.** Related to Figure 2. MALT-1 is expressed in O<sub>2</sub>-sensing neurons.

MALT-1::mCherry translational fusion, expressed from its endogenous promoter (4kb), is expressed in URX neurons in the head which are labelled with a *gcy-37p::gfp* reporter. Similar results were obtained in two experiments. Scale bars: 20µm.

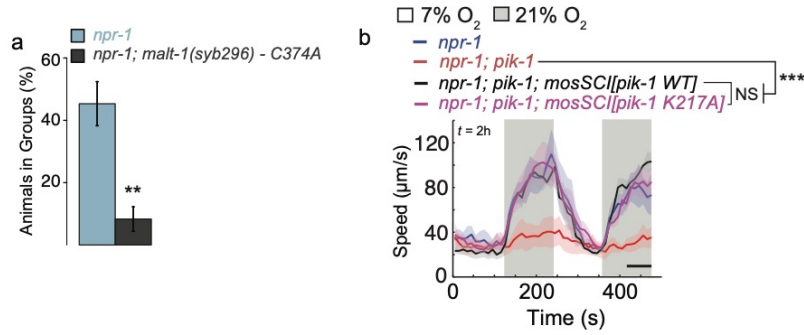

**Supplementary Figure 6.** Related to Figure 5. Targeted disruption of the protease activity of MALT-1 and kinase activity of PIK-1/IRAK.

**a** *malt-1(syb296)* mutants expressing catalytically inactive MALT-1 C374A exhibit strong aggregation defects compared to *npr-1* animals. N = 5 assays, \*\*, P = 0.0018, one-way ANOVA with Tukey's post hoc HSD.

**b** PIK-1 ATP-binding may not be required for avoidance of 21% O<sub>2</sub>. Single copy transgenes (MosSCI) expressing *pik-1* WT and *pik-1* K217A cDNA rescue the O<sub>2</sub>-response defect of *pik-1(tm2167)* mutants equally well. K217 corresponds to the lysine residue coordinating ATP binding in kinase active sites. n = 40 animals (*npr-1*), n = 69 animals (*npr-1; pik-1*), n = 70 animals (*npr-1; pik-1; mosSCI[pik-1 K217A]*), n = 56 animals (*npr-1; pik-1; mosSCI[pik-1 WT]*). Plots show average speed (line) and SEM (shaded regions). NS, P = 0.09, \*\*\*, P < 0.001, two-sided Mann-Whitney U test.



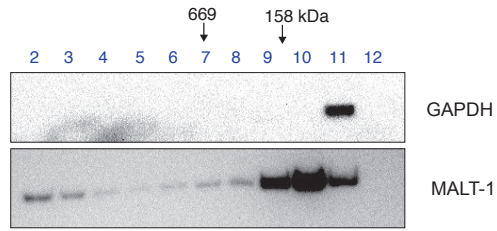

**Supplementary Figure 7.** Related to Figure 6. The elution profile MALT-1 and GAPDH proteins in *C. elegans* extract run on a Superose 6 Gel Filtration column and visualized by immunoblot. Unlike GAPDH control, MALT-1 is found in high-molecular weight fractions. This experiment was performed once.

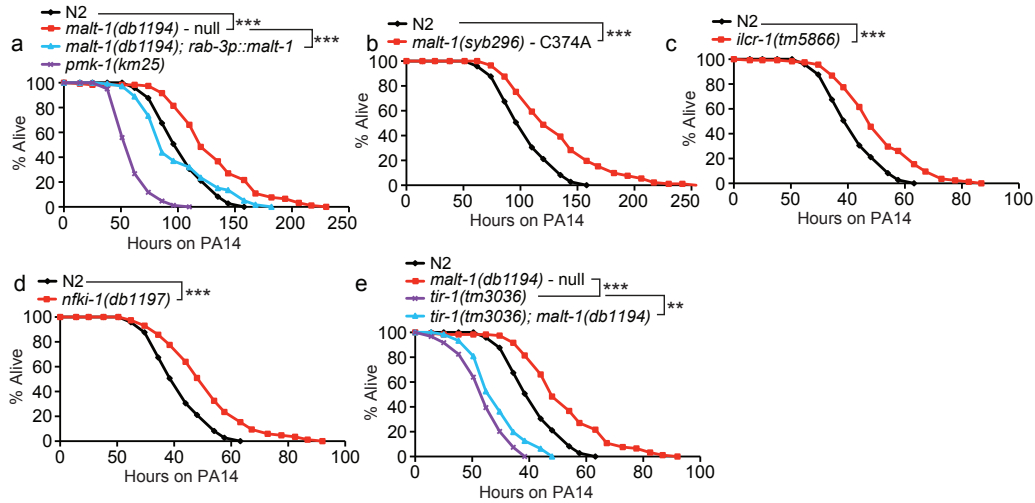

**Supplementary Figure 8.** Related to Figure 8. *P. aeruginosa* PA14 small lawn assays.

**a-d** Mutants defective in *malt-1* and other IL-17 signaling components are resistant to *P. aeruginosa* PA14. The enhanced survival in PA14 small lawn assays of *malt-1* mutants compared to N2 controls is rescued by pan-neuronal expression of *malt-1* gDNA.  $n \geq 74$  animals. \*,  $P < 0.05$ , \*\*,  $P < 0.01$ , \*\*\*,  $P < 0.001$ , logrank test. Precise  $n$  numbers and  $P$  values are provided in Supplementary Table 2.

**e** The enhanced resistance of *malt-1* mutants to PA14 requires TIR-1. Like *tir-1* mutants, *malt-1*; *tir-1* double mutants are hypersensitive to PA14 infection.  $n \geq 95$  animals. \*\*\*,  $P < 0.001$ , logrank test. Precise  $n$  numbers and  $P$  values are provided in Supplementary Table 2.

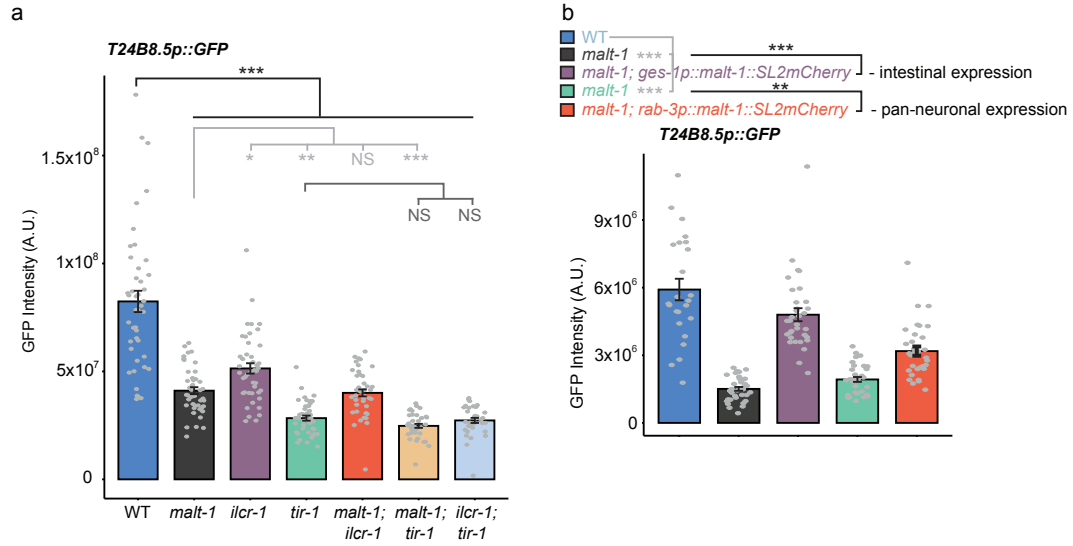

**Supplementary Figure 9.** Related to Figure 8. MALT-1 regulates innate immune response gene expression.

**a** Expression from *T24B8.5p::GFP*, a reporter of the innate immune response, is inhibited in *malt-1*(*db1194*), *ilcr-1*(*tm5866*), and *tir-1*(*tm3036*) mutants compared to N2. n = 44 animals (WT, *malt-1*, and *ilcr-1*), n = 42 animals (*tir-1*), n = 43 animals (*malt-1; ilcr-1*), n = 39 animals (*malt-1; tir-1*), n = 35 animals (*ilcr-1; tir-1*). \*, P < 0.05, \*\*, P < 0.01, \*\*\*, P < 0.001, one-way ANOVA with Tukey's post hoc HSD.

**b** *T24B8.5p::GFP* expression in *malt-1* mutants is restored by tissue-specific expression of WT *malt-1* cDNA in the intestine (*ges-1* promoter) or the nervous system (*rab-3* promoter). n = 42 animals (blue bars), n = 37 animals (black bars), n = 33 animals (purple bars), n = 24 animals (green and red bars). \*\*, P < 0.01, \*\*\*, P < 0.001, one-way ANOVA with Tukey's post hoc HSD.

Fig. 6a

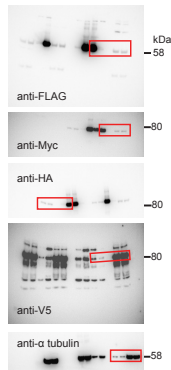

Fig. 6d

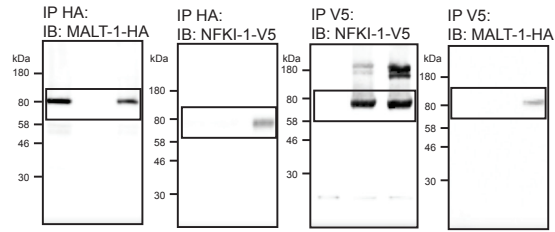

Fig. 6e

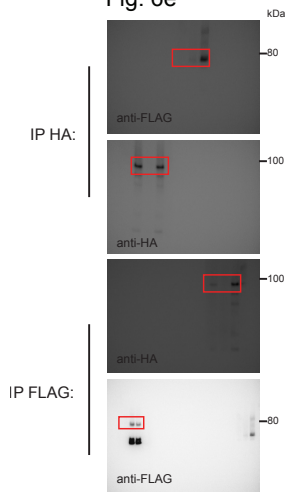

Fig. 6g

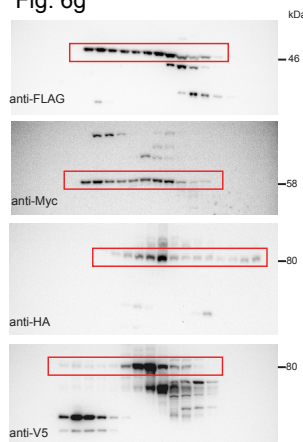

Fig. 7a

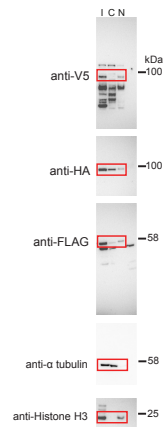

Supplementary Fig. 7

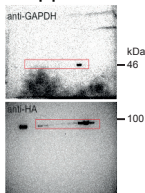

Supplementary Figure 10. Uncropped Western blots (original scans).

## Supplementary Tables

**Supplementary Table 1** Related to Fig. 8. Summary of PA14 big lawn Survival data analysis of IL-17 pathway mutants.

| Strain                                  | Mean lifespan<br>$\pm$ s.e.m.<br>(hours) | Age in hours<br>at 50%<br>mortality | n<br>(died/total) | Bonferroni<br>p value vs.<br>N2 |
|-----------------------------------------|------------------------------------------|-------------------------------------|-------------------|---------------------------------|
| N2                                      | 48.47 $\pm$ 0.8                          | 48                                  | 83/120            |                                 |
| <i>malt-1(db1194)</i>                   | 56.95 $\pm$ 1.35                         | 54                                  | 91/120            | 6.9e-7                          |
| <i>malt-1 (db1194); rab-3p:: malt-1</i> | 45.25 $\pm$ 0.86                         | 48                                  | 86/120            | 0.069<br>(0*)                   |
| <i>pmk-1 (km25)</i>                     | 36.91 $\pm$ 0.62                         | 38                                  | 104/120           | 0                               |
| <i>malt-1(syb296)</i>                   | 62.16 $\pm$ 1.36                         | 62                                  | 81/120            | 0                               |
| <i>ilcr-1 (tm5866)</i>                  | 57.82 $\pm$ 1.25                         | 54                                  | 87/120            | 0                               |
| <i>nfki-1 (db1197)</i>                  | 57.72 $\pm$ 1.31                         | 54                                  | 85/120            | 7.7e-8                          |
| <i>tir-1(tm3036)</i>                    | 41.1 $\pm$ 0.81                          | 38                                  | 98/120            | 1.6e-7<br>(0*)                  |

|                                      |             |    |        |                                      |
|--------------------------------------|-------------|----|--------|--------------------------------------|
| <i>malt-1(db1194); tir-1(tm3036)</i> | 45.2 ± 1.48 | 38 | 98/120 | 0.0319<br>(0.0000014*)<br>(0.2221**) |
|--------------------------------------|-------------|----|--------|--------------------------------------|

\**p* value against *malt-1(db1194)*. \*\* *p* value against *tir-1(tm3036)*.

**Supplementary Table 2** Related to Fig. 8. Summary of PA14 small-lawn survival data analysis of IL-17 pathway mutants.

| <b>Strain</b>                           | <b>Mean lifespan<br/>±s.e.m.<br/>(hours)</b> | <b>Age in hours<br/>at 50%<br/>mortality</b> | <b>n<br/>(died/total)</b> | <b>Bonferroni<br/>p value vs.<br/>N2</b> |
|-----------------------------------------|----------------------------------------------|----------------------------------------------|---------------------------|------------------------------------------|
| N2                                      | 105.18 ± 2.31                                | 110                                          | 95/120                    |                                          |
| <i>malt-1(db1194)</i>                   | 132.14 ± 3.67                                | 120                                          | 96/120                    | 0                                        |
| <i>malt-1 (db1194); rab-3p:: malt-1</i> | 101.31 ± 3.74                                | 86                                           | 74/120                    | 1<br>(1e-7*)                             |
| <i>pmk-1(km25)</i>                      | 61.73 ± 1.34                                 | 62                                           | 112/120                   | 0                                        |
| <i>malt-1(syb296)</i>                   | 132.92 ± 3.92                                | 120                                          | 98/120                    | 2.9e-8                                   |
| <i>ilcr-1(tm5866)</i>                   | 127.20 ± 3.46                                | 120                                          | 91/120                    | 6.8e-7                                   |
| <i>nfki-1(db1197)</i>                   | 129.17 ± 3.54                                | 135                                          | 94/120                    | 2.1e-7                                   |
| <i>tir-1(tm3036)</i>                    | 73.82 ± 2.1                                  | 74                                           | 100/120                   | 0<br>(0*)                                |
| <i>malt-1(db1194); tir-</i>             | 62.19 ± 1.88                                 | 62                                           | 99/120                    | 0                                        |

|          |  |  |  |                    |
|----------|--|--|--|--------------------|
| 1(tm3036 |  |  |  | (0*)<br>(0.0039**) |
|----------|--|--|--|--------------------|

\*p value against *malt-1(db1194)*. \*\* p value against *tir-1(tm3036)*.



**Supplementary Table 3** Related to Fig. 8. Summary of lifespan of IL-17 pathway mutants on OP50.

| Strain                                                       | Mean lifespan<br>±s.e.m.<br>(days) | Age in hours at 50% mortality | n (died/total) | Bonferroni p value vs. N2 | Independent replicate 1<br>(n; mean lifespan<br>±s.e.m.<br>(days);<br>Bonferroni p value) | Independent replicate 2<br>(n; mean lifespan<br>±s.e.m.<br>(days);<br>Bonferroni p value) | Independent replicate 3<br>(n; mean lifespan<br>±s.e.m.<br>(days);<br>Bonferroni p value) |
|--------------------------------------------------------------|------------------------------------|-------------------------------|----------------|---------------------------|-------------------------------------------------------------------------------------------|-------------------------------------------------------------------------------------------|-------------------------------------------------------------------------------------------|
| N2                                                           | 18.68 ± 0.31<br>(Figure 6i-l)      | 19                            | 157/<br>180    |                           | 134/180;<br>17.32 ± 0.37                                                                  | 142/180;<br>18.7 ± 0.31;<br>(Figure 6m)                                                   | 143/180;<br>20.25 ± 0.54                                                                  |
| <i>malt-1</i><br>( <i>db1194</i> )                           | 22.76 ± 0.41<br>(Figure 6j)        | 23                            | 132/<br>180    | 0                         | 112/180;<br>20.84 ± 0.58;<br>2.9e-7                                                       | 146/180;<br>21.29 ± 0.3;<br>1.3e-7<br>(Figure 6m)                                         | 155/180;<br>25.62 ± 0.63;<br>0                                                            |
| <i>malt-1</i><br>( <i>db1194</i> );<br><i>rab-3p::malt-1</i> | 18.56 ± 0.38<br>(Figure 6j)        | 19                            | 109/<br>180    | 1 (0*)                    | 146/180;<br>18.78 ± 0.46;<br>0.0105<br>(0.0115*)                                          |                                                                                           |                                                                                           |
| <i>ilc-17.1</i><br>( <i>tm5218</i> )                         | 20.72 ± 0.35<br>(Figure 6k)        | 21                            | 140/<br>180    | 0.0001                    | 117/180;<br>19.00 ± 0.45;<br>0.0097                                                       |                                                                                           | 112/180;<br>24.06 ± 0.83;;<br>0.0001                                                      |
| <i>ilc-17.1</i><br>( <i>tm5218</i> );<br><i>ilc-17.1p::</i>  | 13.78 ± 0.25<br>(Figure 6k)        | 13                            | 116/<br>180    | 0 (0*)                    | 104/180;<br>13.84 ± 0.31;<br>0 (0**)                                                      | 96/180;<br>16.11 ± 0.32;<br>0.000006                                                      | 105/180;<br>16.56 ± 0.5;<br>0.000004                                                      |

|                                                                              |                             |    |             |                                   |  |                                                                  |                                                            |
|------------------------------------------------------------------------------|-----------------------------|----|-------------|-----------------------------------|--|------------------------------------------------------------------|------------------------------------------------------------|
| <i>ilc-17.1</i>                                                              |                             |    |             |                                   |  | (Figure 6m)                                                      | (0**)                                                      |
| <i>ilc-17.1</i><br>( <i>tm5218</i> );<br><i>malt-1</i><br>( <i>db1194</i> )  | 21.62 ± 0.41<br>(Figure 6l) | 23 | 111/<br>150 | 1.2e-7<br>(0.2044*)<br>(0.3839**) |  |                                                                  | 131/180;<br>23.95 ± 0.64;<br>0.0001<br>(0.1232*)<br>(1**)  |
| <i>malt-1</i><br>( <i>db1194</i> );<br><i>ilc-17.1p::</i><br><i>ilc-17.1</i> |                             |    |             |                                   |  | 92/180;<br>21.48 ± 0.34;<br>4.5e-8 (1*)<br>(0***)<br>(Figure 6m) | 116/180;<br>23.95 ± 0.71;<br>0.0002<br>(0.1847*)<br>(0***) |

\**p* value against *malt-1(db1194)*. \*\**p* value against *ilc-17.1(tm5218)*.

\*\*\**p* value against *ilc-17.1(tm5218)*; *ilc-17.1p:: ilc-17.1*

**Supplementary Table 4** Knockin alleles used in this study.

>*malt-1(syb296)*

C374A

Synonymous mutation

ttaccctactagcactactcctcctcaataatTTTTtattcagAAAATGAACTACAAAACAGTAACTCTCGCTGATCTGACACTT  
GATGAAATGAGATATTTTATTAGAGTTTATCAGAAATTGATTGGAAATGGAGTATACGgtaggtatattgatttttaa  
aatataaaaaagaacactaatttagCTGTATTCTATTTTGTGGTCATGGATTGAAGTGAATGGTCAATGTTATTT  
ACTTGGTGTGATGCTCCAGCAGATGCTCATCAACCACAACATTCAATGAGTATGGATTGGgtaaatacctat  
aaaaactatattagagaatctaaatccaattccagCTTTTGTCAATTTTCCGTCATAAAAACCTCTGATTAAACTTGCTT  
CTTCTTGATGTCGCGCGCAAATTTGTTCCgtaagtattaaactgaattcgcgtaactctgcaaattcgtaaattaaataatcg  
aaaagatattatgacagaacatttttattgaaaaccggcaacaaattctcaaattccacatttgccaaaaattggcagatgccccaaacttttagtacg  
gtatttagaaaaatcgccagctgaacagttgaatattccagATATGATGCGATCAGTGCATTGTGGAATATTCAGAACAAT  
TCAAAAAATTCATCGAGCCCATAGAAATATGGTTTATGGATACTCTACAAGCGGTGGAGTCGGAGCAT  
ATGAGgtttcttttcttgaaaaaagttataaaaattgatttttccagGTAAAGGAGAAGTGAATGGTGTCTTTATGAAATAT  
TTGAAGAATCATGTTCAATTGGAAATATCTGTTATTGATATGTTGAATAAAGTACTATTAGgtaagtatatgaact  
tttctgagaactatacactatccaagtttctactctgattataatTTTTgcagATATTGGGGATGATCAAAAAGTTTGTGATCTTCAA  
GTTCCCGAG

>*malt-1(syb573)*

3XHA + Twin-Strep

Synonymous mutation

CTCAACAATTAGTCGCTACGATTTGGTTTCAATTTTGTGGAAATTTCACAAACAAGgtttctagaaaatgtctctcaatt  
ctttaaagtataaaatattcagGTTTACGTATTTCGCATCAATATCAGACTTCCGTCCTTGCCAGGAAGACACCGATA  
TGGGAGAAAATGAAGAATTAAGTGAAGTGCATTGAATCATCGAGCATTGTTGAATTTCTGAAGAGCT  
TCATTGTTCTGATGTTTCGAGAATATAATGATGATGAAGAAGGTGTCTCAATGTTATGGATTCTATCAGGA  
TTACAAAAAATCAAGAAAGAAGCCGGATTGACATGTGAAGTTCATTTAAGACACGTTGATGATCCAGA  
AAGACGATTGAGATGAAGAATGTTGACATTGGTCATATTTGATTACAAGAATCAAATGTCTACAGTATC  
CATACGACGTCCCAGATTATGCTTACCCGTACGACGTTCCAGACTACGCATATCCATATGATGTCCCAG  
ACTACGCTTGGTCGCACCCGCAATTTGAGAAAGGATCCGCCGGATCCGCCGCGGATCCGGAGCCGG  
ATGGTCCCATCCACAGTTCGAAAAGTAAgctattgccatgtgaacacctacgggtccgaaaatccattattaatttttgccaattgaa  
atgtagtactaatgaaacgaaatctcattatfffacaatgaataaaatcgtaaagtaatgggtatgaattaataaaaacgaataaacgatggaagg

agaaaaaatgaacgaatacggcatcgtgaatgaatgaaacagacaaagcaatgggaaagaacgacaaaaaggatgagaaagagatttcgc  
gtcaatatatagagaaaatgattggacgggtggaga

>*pik-1(syb378)*

linker-2XMyC

Synonymous mutation

AAAAGCATCCATTAATTGCTTCACATATCAAGGGAACACTTGCTTATCTTGCACCAGAATTCATTACATC  
AAAGATTCTTACCACAAAACCTTGATGTCTATAGTTTTGGAATAGTACTTTTGGAAATTGCATCTGGTCAAC  
GGGCATATTCGGATTCTCGTGAAACTCGGGGGCTCGTTGAATATTGTCAGGTTAATAAGGAATTGGCAG  
CACATCGGAAGATTCCAGTCAGAGAGATTTTTATTGATCGACGAGCGCCGCCACTTGTGGTGATGAG  
GAAAAATCATTTTTGGATGCTCTGATTGAAGTTGGATTAGCTGGAGCGAATAACGATCGGAAAGTTCGA  
CCGACTATGTCACAAATTGTTGAATATCTTTGTAAAAATTCAATTCGCCAGTTGTCGGAGGCGGT  
GAACAAAAGTTGATATCCGAAGAGGACCTTGAGCAGAAGCTGATAAGTGAA

GAAGACCTGTAAtaataactgttaccttgccatattctcgaactcgaattttgccattttgagtcaaaactacggtagcgggtctcgacac  
gaccgcctatagagattactgtagcaggggctttttggcaattttatataccggcaatttgccatttgccggaaattcaattctggaatttgccaattgcct  
gaaagttcattccggcaattttccgatttgccgaaagtttcataccggcaatatgctgatttgccgaaattttatctgaaa

>*act1-1(syb412)*

3XFLAG

Synonymous mutation

tagagtttctcattacgaacgctcggaattttggtgatcattttggtctgataaaataaagactcaaataatagctgccaccttctacaaaatttttgattaattgt  
ctaacatcacatttaaaaactcgttttaataaagattgcagatctttctgaaatacatggctggacatctaactctctggctccaaaatgtttacactg  
tgtgaaatgtgtattatagGAAGTGGAAAAAGTAACGGACACGTAAGTGGGAGCTGTAACGAATCAATATCCATTC  
CCCGGAAGTTTTGAACCATTTGTGAAGCGTCTTCTGAGAGATGGAAAAGTGAAGAAACAATCACACAAT  
AATGCAAATGATCATCACGAGGATTCCATGAACTACAGTATTACACAAAGGTGGTGGTGATTACA  
AGGATCACGACGGAGACTATAAAGATCATGATATCGACTACAAGGATGATG

ATGATAAGTAGacaccatgtggtattttgagccaataatctatacatgtagcatctgatgaacttttttcattgtacactttttgatgacagtcac  
gtgttttttagattctcagacagctttactatccacattttcatattacaaaacagatttttcttcaattttctcagttaatctattaagatgtgttccgactttc  
aattccagattttattatacactaatgaaataaatcttacagaagggtc

>nkfi-1(syb617)

V5

Synonymous mutation

TGATGGATGAGCAGACACAGCACAAAATTGACAACAAGTCCATCATCGAAATGTCATCAAGGCTGGAG  
CAGATCCAACGATTGCTgtaagtgattatgtctttgatgattaccaatacagctctttcagGAAACTTCAACTGGAAAGACAA  
TTGTACATCATGCTGTGCGACAAGATGGACGTGGAACCTTTAGATgtaagtccgaattcctcgagttccttaataataaat  
atttaaaatttcagTTCTTAAAAACCGTTGTCAACGAAGACACGTTACCGAGTTGGCAAATCTCTCCGACTTC  
CATGGAGACACCGCAGTCGACCTTTTGTGTAGTTCCACCCAGAACGAGGACACGAATAATGTCCGCGA  
AAATCTATACATCCGACTCCTGACCAGTGGTGCAGTCCCGAACAAGTCGAGAGCTGGAAAGCCAA  
TCCCAAACCCACTTCTTGGACTCGACTCCACC TGA gctctattcagctcattcacattttttgacgttggtg  
cataatgccatcaaaccacctatattgactctcgttatagttattttttttgtgatctcaaaccacctctaatctaaaaaattaaacttgaaaataa  
tcaaaaaattttttaaagacttcattaaaattaatgtgtcattttcctacaacgaccgtaagctattccactcaacgattgtaagtctacagttcaac  
ctctcaattgaatattgaaaataattttaaaacgtttacacctccaacttcaacg

**Supplementary Table 5** Strain list.

| <b>Strain</b> | <b>Genotype</b>                                                                                          |
|---------------|----------------------------------------------------------------------------------------------------------|
| N2            | Wild-type Bristol strain                                                                                 |
| AX204         | <i>npr-1(ad609)</i> X                                                                                    |
| PHX412        | <i>actl-1(syb-412) npr-1(ad609)</i> X                                                                    |
| AX7213        | <i>pik-1(syb-378)</i> II; <i>npr-1(ad609)</i> X                                                          |
| AX6130        | <i>npr-1(ad609) nfki-1(db1198)</i> X; <i>dbls38[nfki-1p::nfki-1::GFP, ccRFP]</i>                         |
| AX6145        | <i>npr-1(ad609)</i> X; <i>dbls38[nfki-1p::GFP, ccRFP]</i>                                                |
| AX6969        | <i>malt-1(db1194)</i> II; <i>npr-1(ad609)</i> X; <i>dbls16[rab-3p::malt-1(gDNA)::GFP, ccRFP]</i>         |
| AX288         | <i>[lon-2(e678) npr-1(ad609)]</i>                                                                        |
| AX5877        | <i>malt-1(db1194)</i> II; <i>npr-1(ad609)</i> X                                                          |
| AX6742        | <i>malt-1(db1194)</i> II; <i>npr-1(ad609)</i> X; <i>dbEx983[rab-3p::malt-1(cDNA)::SL2mCherry, ccGFP]</i> |
| AX6392        | <i>malt-1(db1194)</i> II; <i>npr-1(ad609)</i> X; <i>dbEx925[rab-3p::malt-1(gDNA)::GFP, ccRFP]</i>        |
| AX7502        | <i>dbEx1097[malt-1p(4kb)::malt-1(gDNA)::GFP, ccRFP]</i>                                                  |
| AX7591        | <i>ynls49[flp-5::GFP]; dbEx1119[malt-1p::(4kb)::malt-1(gDNA)::GFP, rol-6(su1006)]</i>                    |
| AX6740        | <i>malt-1(db1194)</i> II; <i>npr-1(ad609)</i> X; <i>dbEx982[gcy-32p::malt-1(cDNA)::SL2mKate, ccGFP]</i>  |
| AX7109        | <i>malt-1(db1194)</i> II; <i>npr-1(ad609)</i> X; <i>dbEx1054[flp-5p::malt-1(cDNA):SL2mKate, ccRFP]</i>   |

AX7132 *malt-1(db1194)* II; *npr-1(ad609)* X; *dbEx982[gcy-32p::malt-1(cDNA)::SL2mKate, ccGFP]*; *dbEx1054[flp-5p::malt-1(cDNA):SL2mKate, ccRFP]*

AX5995 *malt-1(db1194)* II; *npr-1(ad609)* X; *dbEx637[RMGp::YC2.60, ccRFP]*

AX6836 *malt-1(db1194)* II; *npr-1(ad609)* X; *dbEx637[RMGp::YC2.60, ccRFP]*; *dbEx996[npr-1p::malt-1::SL2mCherry, ccRFP]*

AX5989 *malt-1(db1194)* II; *npr-1(ad609)* X; *dbEx614[gcy-37p::YC2.60, ccRFP]*

AX5797 *npr-1(ad609) ilc-17.1(tm5218)* X; *dbEx614[gcy-37p::YC2.60, ccRFP]*

AX5811 *npr-1(ad609) ilc-17.1(tm5218)* X; *dbEx614[RMGp::YC2.60, ccRFP]*

AX6984 *malt-1(db1194)* II; *npr-1(ad609) ilc-17.1(tm5218)* X; *dbEx614[RMGp::YC2.60, ccRFP]*

AX5689 *npr-1(ad609) ilc-17.1(tm5218)* X

AX6727 *malt-1(db1194)* II; *npr-1(ad609)* X; *dbEx978[hsp-16.41p::malt-1::SL2mCherry, ccRFP]*

AX7149 *malt-1(syb296)* II; *npr-1(ad609)* X

AX7221 *malt-1(syb296)* II; *npr-1(ad609)* X; *dbEx1070[rab-3p::malt-1(cDNA)::SL2mKate, ccRFP]*

AX6415 *malt-1(db1194)* II; *npr-1(ad609)* X; *dbEx930[rab-3p::malt-1(C374A)::SL2mCherry, ccRFP]*

AX6991 *malt-1(db1194)* II; *npr-1(ad609)* X; *dbEx1026[rab-3p::malt-1(C374A gDNA)::GFP, ccRFP]*

AX7006 *malt-1(db1194)* II; *npr-1(ad609)* X; *dbls18[rab-3p::malt-1(C374A gDNA)::GFP, ccRFP]*

AX7462 *malt-1(syb573)* II; *pik-1(syb378)* IV; *npr-1(ad609)* *actl-1(syb412)* *nfki-1(syb617)* X

AX7464 *malt-1(syb573)* II; *pik-1(syb378)* IV; *npr-1(ad609)* *actl-1(syb412)* *ilc-17.1(tm5218)* *nfki-1(syb617)* X

AX7229 *pik-1(syb378)* IV; *npr-1(ad609)* *actl-1(syb412)*

PHX617 *nfki-1(syb617)* X

AX6250 *malt-1(db1194)* II; *npr-1(ad609)* *nfki-1(db1198)* X; *dbls38[nfki-1p::nfki-1::GFP, ccRFP]*

AX6142 *pik-1(tm2167)* IV; *npr-1(ad609)* *nfki-1(db1198)* X; *dbls38[nfki-1p::nfki-1::GFP, ccRFP]*

AX7849 *npr-1(ad609)* *ilc-17.1(tm5218)* X; *dbls16[rab-3p::malt-1(gDNA)::GFP, ccRFP]*

AX5663 *ilcr-1(tm5866)* IV; *npr-1(ad609)* X

AX7850 *ilcr-1(tm5866)* IV; *npr-1(ad609)* X; *dbls16[rab-3p::malt-1(gDNA)::GFP, ccRFP]*

AX6008 *npr-1(ad609)* *actl-1(db1203)* X

AX7040 *npr-1(ad609)* *actl-1(db1203)* X; *dbls16[rab-3p::malt-1(gDNA)::GFP, ccRFP]*

AX5909 *pik-1(tm2167)* IV; *npr-1(ad609)* X



AX7637 *pik-1(tm2167) IV; npr-1(ad609) X; dbls16[rab-3p::malt-1(gDNA)::GFP, ccRFP]*

AX7235 *npr-1(ad609) nfki-1(db1197) X; dbls16[rab-3p::malt-1(gDNA)::GFP, ccRFP]*

AX6010 *npr-1(ad609) nfki-1(db1197) X*

AX7586 *ilc-17.1(tm5218) X*

AX7450 *ilc-17.1(tm5218) X; dbls39[ilc-17.1p::ilc-17.1::mCherry]*

AX7585 *malt-1(db1194) II*

AX7449 *malt-1(db1194) II; dbls16[rab-3p::malt-1(gDNA)::GFP, ccRFP]*

KU25 *pmk-1(km25) IV*

PHX296 *malt-1(syb296) II*

AX5949 *ilcr-1(tm5866) IV*

AX7587 *nfki-1(db1197) X*

TM3036 *tir-1(tm3036) III*

AX7649 *malt-1(db1194) II; tir-1(tm3036) III*

AX7847 *malt-1(db1194) II; dbls39[ilc-17.1p::ilc-17.1::mCherry]*

AX7848 *malt-1(db1194) II; ilc-17.1(tm5218)*

AX6859 *malt-1(db1194) II; npr-1(ad609) X; dbEx996[npr-1p::malt-1(cDNA)::SL2mCherry, ccRFP]*

AX6134 *malt-1(db1194) II; pik-1(tm2167) IV; npr-1(ad609) X; dbEx637[RMGp::YC2.60, ccRFP]*

AX7185 *ttTi5605 II; unc-119(ed3) III; pik-1(tm2167) IV; npr-1(ad609) X; MosSCI[unc-119(+); pik-1p::pik-1(K214A)::unc-54 3'UTR]*

AX6666 *ttTi5605 II; unc-119(ed3) III; npr-1(ad609); pik-1(tm2167);  
MosSCI[unc-119(+); pik-1p::pik-1::unc-54 3'UTR]*

AX6829 *malt-1(db1195); npr-1(ad609); ials25[gcy-37p::GFP(+)  
unc-119(+)]  
dbEx979[malt-1p(4kb)::malt-1(gDNA)::mCherry, ccGFP]*

AX7479 *agls219[T24B8.5p::GFP::unc-54-3' UTR + ttx-3p::GFP::unc-54-3'  
UTR] III*

AX7480 *malt-1(db1194) II; agls219[T24B8.5p::GFP::unc-54-3' UTR + ttx-  
3p::GFP::unc-54-3' UTR] III*

AX7852 *ilcr-1(tm5866) IV; agls219[T24B8.5p::GFP::unc-54-3' UTR + ttx-  
3p::GFP::unc-54-3' UTR] III*

AX7595 *tir-1(tm3036) III; agls219[T24B8.5p::GFP::unc-54-3' UTR + ttx-  
3p::GFP::unc-54-3' UTR] III*

AX7871 *malt-1(db1194) II; ilcr-1(tm5866) IV; agls219[T24B8.5p::GFP::unc-  
54-3' UTR + ttx-3p::GFP::unc-54-3' UTR] III*

AX7872 *malt-1(db1194) II; tir-1(tm3036) III; agls219[T24B8.5p::GFP::unc-  
54-3' UTR + ttx-3p::GFP::unc-54-3' UTR] III*

AX7854 *tir-1(tm3036) III; ilcr-1(tm5866) IV; agls219[T24B8.5p::GFP::unc-  
54-3' UTR + ttx-3p::GFP::unc-54-3' UTR] III*

AX7572 *malt-1(db1194) II; agls219[T24B8.5p::GFP::unc-54-3' UTR + ttx-  
3p::GFP::unc-54-3' UTR] III; dbEx110[rab-3p::malt-1::SL2mCherry,  
ccRFP]*

AX7573 *malt-1(db1194) II; agIs219[T24B8.5p::GFP::unc-54-3' UTR + ttx-3p::GFP::unc-54-3' UTR] III; dbEx111[ges-1p::malt-1::SL2mCherry, ccRFP]*

**Supplementary Table 6** Primers used in this study.

Primers for cloning *malt-1* promoter, cDNA and gDNA:

|                          |                                                                    |
|--------------------------|--------------------------------------------------------------------|
| <i>malt-1</i> promoter F | ggggACAACCTTTGTATAGAAAAGTTGctgccggtggattccaacatattg                |
| <i>malt-1</i> promoter R | ggggACTGCTTTTTTGTACAAACTTGctgaaattggggttcaagaaatatttttgatttttaaata |
| <i>malt-1</i> ORF F      | ggggACAAGTTTGTACAAAAAAGCAGGCTtttcagaaaaatgaacacaaactggcggagtt      |
| <i>malt-1</i> ORF R      | ggggACCACTTTGTACAAGAAAGCTGGGTATTACTGTAGACAT                        |
| <i>malt-1</i> (C374A) F  | TCTTGATGTCgcCAGAAAATTTGTTCCATATG                                   |
| <i>malt-1</i> (C374A) R  | gcgcgtcaagttgtGCCTGACGACGAGTTGTGCTGTTTTAGAGCTAGAA                  |

Oligos for generating sgRNA expression plasmid used to make *db1194*:

|                             |                                                   |
|-----------------------------|---------------------------------------------------|
| <i>malt-1</i> sgRNA EcoRI 1 | gcgcgtcaagttgtGgatcaggtatccaccgtagGTTTTAGAGCTAGAA |
| <i>malt-1</i> sgRNA EcoRI 2 | TTCTAGCTCTAAAACctacggtggatacctgatcCacaacttgacgcgc |

Primers for cloning with *E. coli* expression plasmids:

|               |                                                                                                   |
|---------------|---------------------------------------------------------------------------------------------------|
| MALT-1-HA F   | ATATATGCTCTTCTAGTAACACAAACTTGGCGGAGTTACCTG                                                        |
| MALT-1-HA R   | TATATAGCTCTTCATGCAGCATAATCTGGTACGTCGTATGGGTATCCTCCTC<br>CCTGTAGACATTTGATTCTTGTAAATCAAAATATGACC    |
| ACTL-1-FLAG F | ATATATGCTCTTCTAGTACTAAGATGAAAATGGACGTAACAATTGAGTTGG                                               |
| ACTL-1-FLAG R | TATATAGCTCTTCATGCCTTGTGCATCGTCGTCCTTGTAAATCTCCTCCTC-<br>CTTGTGTAATACTGTAGTTCATGGAATCCTCG          |
| NFKI-1-V5 F   | ATATATGCTCTTCTAGTGCAACCGTTGCCCCAAGGGAAACTGC                                                       |
| NFKI-1-V5 R   | TATATAGCTCTTCATGCCGTAGAATCGAGACCGAGGAGAGGGTTAG-<br>GGATAGGCTTACCTCCTCCTCCAGCTCTCGACTTGTTCGGGACTGC |

Primers for cloning with *S. cerevisiae* Y2H plasmids:

|                             |                                   |
|-----------------------------|-----------------------------------|
| NFKI-1(full) EcoRI/BamHI 1  | GCGAATTCATGGCAACCGTTGCCCC         |
| NFKI-1(full) EcoRI/BamHI 2  | GCGGATCCTCAAGCTCTCGACTTGTTCCGG    |
| NFKI-1(1-374) EcoRI/BamHI 1 | GCGAATTCATGGCAACCGTTGCCCC         |
| NFKI-1(1-374) EcoRI/BamHI 2 | GCGGATCCTCATGCATCGCGGTTAGTAAG     |
| MALT-1(full) XmaI/XhoI 1    | GTTCCCGGGGATGAACACAACTTGCGCG      |
| MALT-1(full) XmaI/XhoI 2    | CGGCTCGAGTTACTGTAGACATTTGATTCTTGT |
| MALT-1(1-81) XmaI/XhoI 1    | GTTCCCGGGgATGAACACAACTTGCGCG      |
| MALT-1(1-81) XmaI/XhoI 2    | CGGCTCGAGTTATCTTGAAAGAACTGCAATCT  |
| MALT-1(248-639) XmaI/XhoI 1 | GTTCCCGGGgCGAGCAGCAGATAAAGTTG     |
| MALT-1(248-639) XmaI/XhoI 1 | CGGCTCGAGTTACTGTAGACATTTGATTCTTGT |
