# Supplementary material for: MALT-1 mediates IL-17 neural signaling to regulate C. elegans behavior, immunity and longevity
Source: PubMed Central journal article supplement (PMC7190641; doi:10.1038/s41467-020-15872-y), 2020-04-29
Supplement: 41467_2020_15872_MOESM3_ESM.pdf [file 41467_2020_15872_MOESM3_ESM.pdf]

## Description of Additional Supplementary Files

**Supplementary Data 1.** Related to Figure 1. LC-MS/MS analysis of proteins co-immunoprecipitating with IL-17 signaling components. Shown are total spectral counts for all proteins that specifically co-IP with ACTL-1 (**a**), PIK-1 (**b**), NFκI-1 (**c**), and MALT-1 (**d**).

**Supplementary Data 2.** Related to Figure 6. Peptides derived from MALT-1 and PIK-1 detected in quantitative LC-MS/MS of proteins that interact with NFκI-1::GFP (Fig. 6b and c).

**Supplementary Data 3.** Related to Figure 8. Whole-animal gene-expression profiles of *ilc-17.1(tm5218)*; *npr-1*, *malt-1(db1194)*; *npr-1*, and *nfki-1(db1197)*; *npr-1* mutants compared to *npr-1* controls.

**a** and **b**, All genes significantly downregulated (**a**) and upregulated (**b**) in all three conditions compared to control. FPKM values, fold-change and statistics for each gene are shown for the *npr-1* vs *npr-1*; *ilc-17.1(tm5218)* comparison.

**c** and **d**, Significantly enriched GO (**c**) and KEGG (**d**) terms for genes whose expression is significantly altered in all three mutants compared to control, with a log<sub>2</sub> fold-change cut-off of 0.25.

**Supplementary Data 4.** Related to Figure 8. Comparison of neuropeptide gene expression in mutants defective in response to 21% O<sub>2</sub><sup>30</sup>, and mutants defective in IL-17 signaling.

**Supplementary Data 5.** Related to Figure 8. Statistical analysis of survival data for IL-17 pathway mutants on PA14. Shown are Kaplan-Meier analysis and logrank tests for big lawn (**a** and **b**) and small lawn (**c** and **d**) assays.

**Supplementary Data 6** Related to Figure 8. Statistical analysis of survival data for IL-17 pathway mutants on OP50. Shown are Kaplan-Meier analyses (**a-d**) and logrank tests (**e-h**).
